# Supplementary material for: Association of occasional smoking with total mortality in the population-based Tromsø study, 2001–2015
Source: PubMed Central journal article supplement — BMJ Open. 2017 Dec 28;7(12):e019107. doi: 10.1136/bmjopen-2017-019107 (PMC5770901; doi:10.1136/bmjopen-2017-019107), 2017-12-28
Supplement: bmjopen-2017-019107supp002.pdf [file bmjopen-2017-019107supp002.pdf]

Label

## Additional questions to the health survey in Troms and Finnmark 2001-2002

The main aim of the Tromsø Study is to improve our knowledge about cardiovascular diseases in order to aid prevention. The study is also intended to improve our knowledge of cancer and other general conditions, such as allergies, muscle pains and mental conditions. We would therefore like you to answer some questions about factors that may be relevant for your risk of getting these and other illnesses. This form is part of the Health Survey, which has been approved by the Norwegian Data Inspectorate and the Regional Board of Research Ethics. The answers will only be used for research purposes and will be treated strictly confidential.

### T1. NEIGHBORHOOD AND HOME

**1.1 In which municipality did you live at the age of 1 year?**  
(If you have not lived in Norway, state country of residence instead of the municipality)

**1.2 What type of house do you live in? (Tick only once)**

- Detached house/villa..... ☐ 1  
 Farm ..... ☐ 2  
 Flat/apartment ..... ☐ 3  
 Terraced/semi-detached house ..... ☐ 4  
 Institution/care home ..... ☐ 5  
 Other ..... ☐ 6

**1.3 How big is your house?**    m<sup>2</sup> (gross)

**1.4 Are you bothered by: (Tick once for each line)**

- |                                                    | No complaint             | Little complaint         | Severe complaint         |
|----------------------------------------------------|--------------------------|--------------------------|--------------------------|
| Moisture, drought or coldness in your home         | <input type="checkbox"/> | <input type="checkbox"/> | <input type="checkbox"/> |
| Other forms of bad indoor climate .....            | <input type="checkbox"/> | <input type="checkbox"/> | <input type="checkbox"/> |
| Traffic noise (cars or aircraft) .....             | <input type="checkbox"/> | <input type="checkbox"/> | <input type="checkbox"/> |
| Other noise (industrial, construction, etc.) ..... | <input type="checkbox"/> | <input type="checkbox"/> | <input type="checkbox"/> |
| Neighbour noise .....                              | <input type="checkbox"/> | <input type="checkbox"/> | <input type="checkbox"/> |
| Drinking water quality .....                       | <input type="checkbox"/> | <input type="checkbox"/> | <input type="checkbox"/> |
| Air pollution from traffic .....                   | <input type="checkbox"/> | <input type="checkbox"/> | <input type="checkbox"/> |
| Air pollution from wood/oil heating, factory etc.  | <input type="checkbox"/> | <input type="checkbox"/> | <input type="checkbox"/> |

**1.5 What home language did your grandparents have?**  
(Tick for one or more alternatives)

- |                       | Norwegian                | Sami                     | Kven/<br>Finnish         | Other language           |
|-----------------------|--------------------------|--------------------------|--------------------------|--------------------------|
| Mother's mother ...   | <input type="checkbox"/> | <input type="checkbox"/> | <input type="checkbox"/> | <input type="checkbox"/> |
| Mother's father ..... | <input type="checkbox"/> | <input type="checkbox"/> | <input type="checkbox"/> | <input type="checkbox"/> |
| Father's mother ...   | <input type="checkbox"/> | <input type="checkbox"/> | <input type="checkbox"/> | <input type="checkbox"/> |
| Father's father ..... | <input type="checkbox"/> | <input type="checkbox"/> | <input type="checkbox"/> | <input type="checkbox"/> |

The information you give us may later be linked with information from other public health registers in accordance with the rules laid down by the Data Inspectorate and the Regional Board of Research Ethics.

If you are unsure about what to answer, tick the box that you feel fits best.

The completed form should be sent to us in the enclosed prepaid envelope. Thank you in advance for helping us.

Yours sincerely

Department of Community Medicine  
University of Tromsø

National Health  
Screening Service

If you do not wish to answer the questionnaire, tick the box below and return the form. Then you will not receive reminders.

I do not wish to answer the questionnaire ☐

Date of completion:

Day Month Year

T

### T1. NEIGHBORHOOD AND HOME (cont.)

**1.6 What do you consider yourself as?**  
(Tick for one or more alternatives)

- Norwegian ☐ Sami ☐ Kven/  
Finnish ☐ Other ☐

**1.7 Do you feel that you have enough good friends?** Yes ☐ No ☐

**1.8 How often do you normally take part in organised gatherings, e.g. sewing circles, sports clubs, political meetings or other associations?**  
(Tick only once)

- Never, or just a few times a year ..... ☐ 1  
 1-3 times a month ..... ☐ 2  
 Approximately once a week ..... ☐ 3  
 More than once a week ..... ☐ 4

### T2. PAID AND UNPAID WORK

**2.1 If you have paid or unpaid work, how would you describe your work? (Tick only once)**

- Mostly sedentary work?  
(e.g. office work, mounting) ..... ☐ 1  
 Work that requires a lot of walking?  
(e.g. shop assistant, light industrial work, teaching) ☐ 2  
 Work that requires a lot of walking and lifting?  
(e.g. Postman, nursing, construction) ..... ☐ 3  
 Heavy manual labour?  
(e.g. forestry, heavy farm-work, heavy construction) ..... ☐ 4

**2.2 Can you decide yourself how your work (paid or unpaid) should be organised? (Tick only once)**

- No, not at all ..... ☐ 1  
 To a small extent ..... ☐ 2  
 Yes, to a large extent ..... ☐ 3  
 Yes, I decide myself ..... ☐ 4

**2.3 Are you on call, do you work shifts or nights?**

Yes ☐ No ☐

## T3. TOBACCO

### 3.1 Do you smoke?

Yes, daily ☐ 1 Yes, sometimes ☐ 2 No, never ☐ 3

If "Yes, sometimes"

#### What do you smoke?

☐ Cigarettes ☐ Pipe ☐ Cigar/cigarillos

### 3.2 Have you used or do you use snuff daily?

Yes, now ☐ Yes, previously ☐ Never ☐

If YES:

How many years altogether have you used snuff?

years

## T4. ALCOHOL

### 4.1 Are you a teetotaler?

Yes ☐ No ☐

### 4.2 How many times a month do you normally drink alcohol? Number of times

(Do not count low-alcohol beer. Put 0 if less than once a month)

### 4.3 How many glasses of beer, wine or spirits do you normally drink in a fortnight?

(Do not count low-alcohol beer. Put 0 if you do not drink alcohol)

Beer  Wine  Spirits

### 4.4 For approximately how many years has your alcohol consumption been at the same level you described above?

years

### 4.5 Have you, in one or more periods in the last 5 years consumed so much alcohol that it has inhibited your work or social life?

Yes, at work ☐ 1 Yes, socially ☐ 2 Yes, both at work and social life ☐ 3 No, never ☐ 4

## T5. FOOD AND DIETARY SUPPLEMENTS

### 5.1 Do you usually eat breakfast every day?

Yes ☐ No ☐

### 5.2 How many times a week do you eat a warm dinner?

times

### 5.3 How important is it for you to have a healthy diet?

Very ☐ 1 Somewhat ☐ 2 Little ☐ 3 Not ☐ 4

### 5.4 Do you use the following dietary supplements?

Yes, daily sometimes No

Iron tablets ☐ ☐ ☐

Calcium tablets or bonemeal ☐ ☐ ☐

Vitamin D supplements ☐ ☐ ☐

Cod liver oil ☐ ☐ ☐

## T6. BODY WEIGHT

### 6.1 Do you currently try to change your body weight?

No ☐ 1 Yes, I try to gain weight ☐ 2 Yes, I try to lose weight ☐ 3

### 6.2 What weight would you be satisfied with (your "ideal weight")?

kg

## T7. ILLNESSES AND INJURIES

### 7.1 Have you ever had:

Tick once for each question. Also give the age at the time. If you have had the condition several times, how old were you the last time

Severe injury requiring hospital admission ☐ Yes ☐ No  years

Ankle fracture ☐ ☐  years

Peptic ulcer ☐ ☐  years

Peptic ulcer surgery ☐ ☐  years

Neck surgery ☐ ☐  years

Prostate surgery ☐ ☐  years

### 7.2 Do you have, or have you ever had: (Tick once for each question)

Yes No

Cancer ☐ ☐

Psoriasis ☐ ☐

Thyroid disease ☐ ☐

Glaucoma ☐ ☐

Cataract ☐ ☐

Osteoarthritis (arthrosis) ☐ ☐

Bent fingers ☐ ☐

Skin contractions in your palms ☐ ☐

Kidney stone ☐ ☐

Appendectomy ☐ ☐

Hernia surgery ☐ ☐

Surgery/treatment for urine incontinence ☐ ☐

Epilepsy ☐ ☐

Poliomyelitis (polio) ☐ ☐

Parkinson's disease ☐ ☐

Migraine ☐ ☐

Leg ulcer ☐ ☐

#### Allergy and hypersensitivity:

Yes No

Atopic eczema (e.g. childhood eczema) ☐ ☐

Hand eczema ☐ ☐

Food allergy ☐ ☐

Other hypersensitivity (not allergy) ☐ ☐

### 7.3 Have you had common cold, influenza, gastroenteritis, etc. during the last 14 days?

Yes No ☐ ☐

### 7.4 Have you during the last 3 weeks had common cold, influenza, bronchitis, pneumonia, sinusitis, or other respiratory infection?

Yes No ☐ ☐

### 7.5 Have you ever had bronchitis or pneumonia?

Yes No ☐ ☐

### 7.6 Have you during the last 2 years had bronchitis or pneumonia? (Tick only once)

No ☐ 1 1-2 times ☐ 2 More than 2 times ☐ 3

## T8. SYMPTOMS

### 8.1 Have you in the last two weeks felt:

(Tick once for each question)

|                            | No                       | A Little                 | A lot                    | Very much                |
|----------------------------|--------------------------|--------------------------|--------------------------|--------------------------|
| Nervous or worried .....   | <input type="checkbox"/> | <input type="checkbox"/> | <input type="checkbox"/> | <input type="checkbox"/> |
| Bothered by anxiety.....   | <input type="checkbox"/> | <input type="checkbox"/> | <input type="checkbox"/> | <input type="checkbox"/> |
| Confident and calm .....   | <input type="checkbox"/> | <input type="checkbox"/> | <input type="checkbox"/> | <input type="checkbox"/> |
| Irritable.....             | <input type="checkbox"/> | <input type="checkbox"/> | <input type="checkbox"/> | <input type="checkbox"/> |
| Happy and optimistic ..... | <input type="checkbox"/> | <input type="checkbox"/> | <input type="checkbox"/> | <input type="checkbox"/> |
| Down/depressed .....       | <input type="checkbox"/> | <input type="checkbox"/> | <input type="checkbox"/> | <input type="checkbox"/> |
| Lonely.....                | <input type="checkbox"/> | <input type="checkbox"/> | <input type="checkbox"/> | <input type="checkbox"/> |
|                            | 1                        | 2                        | 3                        | 4                        |

### 8.2 Do you cough about daily for periods of the year?

If YES:

Is your cough productive? ..... ☐ Yes ☐ No

Have you had this kind of cough for as long as 3 months in each of the last two years?..... ☐ Yes ☐ No

### 8.3 Have you had episodes with wheezing in the chest?

If YES:

Has this occurred: (Tick once for each question) Yes No

At night ..... ☐ Yes ☐ No

In connection with respiratory infections ..... ☐ Yes ☐ No

In connection with physical exertion ..... ☐ Yes ☐ No

In connection with very cold weather ..... ☐ Yes ☐ No

### 8.4 Do you get pain in the calf while walking .....

If YES:

How long can you go before you notice the pain?.....    meter

### 8.5 Do you get short-winded in the following situations? (Tick once for each question)

|                                                             | Yes                      | No                       |
|-------------------------------------------------------------|--------------------------|--------------------------|
| While walking fast on level ground or slight up hills ..... | <input type="checkbox"/> | <input type="checkbox"/> |
| While walking calmly on level ground .....                  | <input type="checkbox"/> | <input type="checkbox"/> |
| While washing or dressing yourself .....                    | <input type="checkbox"/> | <input type="checkbox"/> |
| While resting .....                                         | <input type="checkbox"/> | <input type="checkbox"/> |

### 8.6 Do you have to stop because of short-windedness while walking in your own pace on level ground?...

### 8.7 Have you during the last year suffered from pain and/or stiffness in muscles and joints that have lasted continuously for at least 3 months?

If YES:

Has the complaint reduced your leisure time activity? ..... ☐ Yes ☐ No

#### For how long has the complaint endured in total?

approx.  years and  months

#### Has the complaint reduced your ability to work during the last year? (Also applies to domestic workers and pensioners (Tick once))

| No/insignificantly         | To some extent             | Significantly reduced      | Do not know                |
|----------------------------|----------------------------|----------------------------|----------------------------|
| <input type="checkbox"/> 1 | <input type="checkbox"/> 2 | <input type="checkbox"/> 3 | <input type="checkbox"/> 4 |

#### Have you been on sick leave due to these complaints during the last year?.....

Yes No Do not work

☐ ☐ ☐

## T8. SYMPTOMS (continue)

### 8.8 How often do you suffer from sleeplessness?

(Tick only once)

Never, or just a few times a year ..... ☐ 1

1-3 times a month ..... ☐ 2

Approximately once a week ..... ☐ 3

More than once a week ..... ☐ 4

### 8.9 If you suffer from sleeplessness monthly or more frequently, what time of the year does it affect you most?

No particular time of the year ..... ☐ 1

Especially during the polar night ..... ☐ 2

Especially during the midnight sun season ..... ☐ 3

Especially in spring and autumn ..... ☐ 4

### 8.10 Have you in the last year suffered from sleeplessness to the extent that it has affected your ability to work ?

Yes No

☐ ☐

### 8.11 Do you usually sleep during the day?.....

☐ Yes ☐ No

### 8.12 How often do you suffer from urinary incontinence?

Never ..... ☐ 1

Not more than once a month ..... ☐ 2

Two or more times a month ..... ☐ 3

Once a week or more ..... ☐ 4

### 8.13 Are you able to walk down 10 steps without holding on to something (e.g. a handrail) ...

Yes No

☐ ☐

### 8.14 Do you use glasses?.....

☐ Yes ☐ No

### 8.15 Do you use a hearing aid?.....

☐ Yes ☐ No

### 8.16 How is your memory? (Tick once for each question)

|                                                      | Yes                      | No                       |
|------------------------------------------------------|--------------------------|--------------------------|
| Do you forget what you just have heard or read?..... | <input type="checkbox"/> | <input type="checkbox"/> |
| Do you forget where you have placed things?.....     | <input type="checkbox"/> | <input type="checkbox"/> |
| Is it more difficult to remember now than earlier?.. | <input type="checkbox"/> | <input type="checkbox"/> |
| Do you more often write memos now than earlier?      | <input type="checkbox"/> | <input type="checkbox"/> |

#### If "YES" on one of these questions; Is this a problem in your daily life?.....

Yes No

☐ ☐

## T9. MEDICINES

### 9.1 Do you use, or have you used any of the following medicines:

|                                            | Now                      | Previously, but not now  | Age when used 1 <sup>st</sup> time | Never used               |
|--------------------------------------------|--------------------------|--------------------------|------------------------------------|--------------------------|
| Drugs for osteoporosis.....                | <input type="checkbox"/> | <input type="checkbox"/> | <input type="text"/> years         | <input type="checkbox"/> |
| Tablets for diabetes .....                 | <input type="checkbox"/> | <input type="checkbox"/> | <input type="text"/> years         | <input type="checkbox"/> |
| Drugs for hypothyroidism (thyroxine) ..... | <input type="checkbox"/> | <input type="checkbox"/> | <input type="text"/> years         | <input type="checkbox"/> |

### 9.2 Do you use any medicines which you take as injections?

Yes No

☐ ☐

#### If YES: Give the name of the medicines (for injection): (one name per line)

\_\_\_\_\_

\_\_\_\_\_

## T10. ILLNESS IN THE FAMILY

### 10.1 Tick for the relatives who have or have ever had any of the diseases: (Tick for each line)

|                               | Mother                   | Father                   | Brother                  | Sister                   | Child                    | None of these            |
|-------------------------------|--------------------------|--------------------------|--------------------------|--------------------------|--------------------------|--------------------------|
| Heart attack (heart wound)    | <input type="checkbox"/> |
| Angina pectoris (heart cramp) | <input type="checkbox"/> |
| High blood pressure .....     | <input type="checkbox"/> |
| Aneurysm.....                 | <input type="checkbox"/> |
| Gastric/duodenal ulcer ....   | <input type="checkbox"/> |
| Hip fracture .....            | <input type="checkbox"/> |
| Psychological problems ..     | <input type="checkbox"/> |
| Allergy .....                 | <input type="checkbox"/> |
| Osteoarthritis (arthrosis) .. | <input type="checkbox"/> |
| Dementia .....                | <input type="checkbox"/> |

### 10.2 How many siblings and children do you have?

|                             |                      |                      |
|-----------------------------|----------------------|----------------------|
| Brothers                    | Sisters              | Children             |
| Number <input type="text"/> | <input type="text"/> | <input type="text"/> |

### 10.3 Do you usually do extra caring work because of illness etc. in your close family?

|                            |                            |                            |
|----------------------------|----------------------------|----------------------------|
| Yes, daily/almost daily    | Yes, sometimes             | No                         |
| <input type="checkbox"/> 1 | <input type="checkbox"/> 2 | <input type="checkbox"/> 3 |

### 10.4 Do you/your family receive home aid or home nursing care?.....

|                          |                          |
|--------------------------|--------------------------|
| Yes                      | No                       |
| <input type="checkbox"/> | <input type="checkbox"/> |

### 10.5 Is your mother alive? .....

|                          |                          |                      |
|--------------------------|--------------------------|----------------------|
| Yes                      | No                       | Age at death         |
| <input type="checkbox"/> | <input type="checkbox"/> | <input type="text"/> |

### 10.6 Is your father alive? .....

|                          |                          |                      |
|--------------------------|--------------------------|----------------------|
| Yes                      | No                       | Age at death         |
| <input type="checkbox"/> | <input type="checkbox"/> | <input type="text"/> |

## T11. MOBILE TELEPHONE

### 11.1 Do you have (own, rent, etc.) a mobile telephone?

|                            |                            |                            |
|----------------------------|----------------------------|----------------------------|
| Yes, always                | Yes, sometimes             | No                         |
| <input type="checkbox"/> 1 | <input type="checkbox"/> 2 | <input type="checkbox"/> 3 |

If Yes:

What do you use your mobile telephone for, and how often do you use it? (Tick once for each line)

|                 | Number of times per day  |                          |                          |                          |                          |
|-----------------|--------------------------|--------------------------|--------------------------|--------------------------|--------------------------|
|                 | 30 or more               | 10-29                    | 2-9                      | 1 or less                | Never                    |
| Conversations.. | <input type="checkbox"/> |
| Text messaging  | <input type="checkbox"/> |

12345

## T12. THE REST IS TO BE ANSWERED BY WOMEN ONLY

### 12.1 If you have given birth, fill in each child's birth year and how many months you breastfed after delivery.

(If you did not breastfeed, write 0)

| Child:                | Birth year:          | Number of months breastfed: |
|-----------------------|----------------------|-----------------------------|
| 1 <sup>st</sup> child | <input type="text"/> | <input type="text"/>        |
| 2 <sup>nd</sup> child | <input type="text"/> | <input type="text"/>        |
| 3 <sup>rd</sup> child | <input type="text"/> | <input type="text"/>        |
| 4 <sup>th</sup> child | <input type="text"/> | <input type="text"/>        |
| 5 <sup>th</sup> child | <input type="text"/> | <input type="text"/>        |
| 6 <sup>th</sup> child | <input type="text"/> | <input type="text"/>        |

(If more children, use additional sheet)

## T12. THE REST IS TO BE ANSWERED BY WOMEN ONLY

### 12.2 If you still have menstruate or are pregnant: What date did your last menstruation start?

|                      |                      |                      |
|----------------------|----------------------|----------------------|
| Day                  | Month                | Year                 |
| <input type="text"/> | <input type="text"/> | <input type="text"/> |

### 12.3 If you no longer menstruate; why did your periods stop? (Tick once)

|                                                 |                            |
|-------------------------------------------------|----------------------------|
| It stopped by itself .....                      | <input type="checkbox"/> 1 |
| Uterus surgery .....                            | <input type="checkbox"/> 2 |
| Surgically removed both ovaries .....           | <input type="checkbox"/> 3 |
| Other reason (e.g. radiation, chemotherapy) ... | <input type="checkbox"/> 4 |

### 12.4 Do you use or have you used prescribed estrogen (tablets or patches)?.....

|                          |                          |
|--------------------------|--------------------------|
| Yes                      | No                       |
| <input type="checkbox"/> | <input type="checkbox"/> |

If YES:

How old were you when you started taking estrogen ? .....

|                      |       |
|----------------------|-------|
| <input type="text"/> | years |
|----------------------|-------|

If you stopped using estrogen,

How old were you when you stopped taking estrogen?.....

|                      |       |
|----------------------|-------|
| <input type="text"/> | years |
|----------------------|-------|

### 12.5 Do you use or have you used oral contraceptive pills?.....

|                          |                          |
|--------------------------|--------------------------|
| Yes                      | No                       |
| <input type="checkbox"/> | <input type="checkbox"/> |

If YES:

How old were you when you started taking the pill?.....

|                      |       |
|----------------------|-------|
| <input type="text"/> | years |
|----------------------|-------|

How many years in total have you taken the pills?.... Number of years

|                      |
|----------------------|
| <input type="text"/> |
|----------------------|

If you have given birth:

How many years did you take the pill before your first delivery?... Number of years

|                      |
|----------------------|
| <input type="text"/> |
|----------------------|

If you stopped taking the pill:

How old were you when you stopped?....

|                      |       |
|----------------------|-------|
| <input type="text"/> | years |
|----------------------|-------|

### 12.6 Apart from pregnancy and after giving birth, have you ever stopped having menstruation for 6 months or more?

|                          |                          |
|--------------------------|--------------------------|
| Yes                      | No                       |
| <input type="checkbox"/> | <input type="checkbox"/> |

If YES:

How many times?.....

|                      |       |
|----------------------|-------|
| <input type="text"/> | times |
|----------------------|-------|

### 12.7 How is your current menstruation status?

|                                              |                            |
|----------------------------------------------|----------------------------|
| I have not had menstruation in the last year | <input type="checkbox"/> 1 |
| I have regular menstruation .....            | <input type="checkbox"/> 2 |
| I have irregular menstruation .....          | <input type="checkbox"/> 3 |

### 12.8 When you were 25-29 years old, how many days usually passed between the start of two periods?

|                      |                      |                          |
|----------------------|----------------------|--------------------------|
| Minimum              | Maximum              | Do not know              |
| <input type="text"/> | <input type="text"/> | <input type="checkbox"/> |
| days                 | days                 |                          |

The periods were of approximately equal length every time?.....

|                          |                          |
|--------------------------|--------------------------|
| Yes                      | No                       |
| <input type="checkbox"/> | <input type="checkbox"/> |

How many days did a typical menstrual bleeding period last?...  days

**Thank you for the help!**  
**Remember to mail the form today!**
